# Supplementary material for: Bacteriophage infection drives loss of β-lactam resistance in methicillin-resistant Staphylococcus aureus
Source: eLife journal article supplement (doi:10.7554/elife.102743), 2024-10-25

**Figure 1–Source Data 1**

**For Figure 1B:** Plaquing images of bacteriophage  $\Phi$ Staph1N against parental MRSA strains MRSA252, MW2, and LAC.

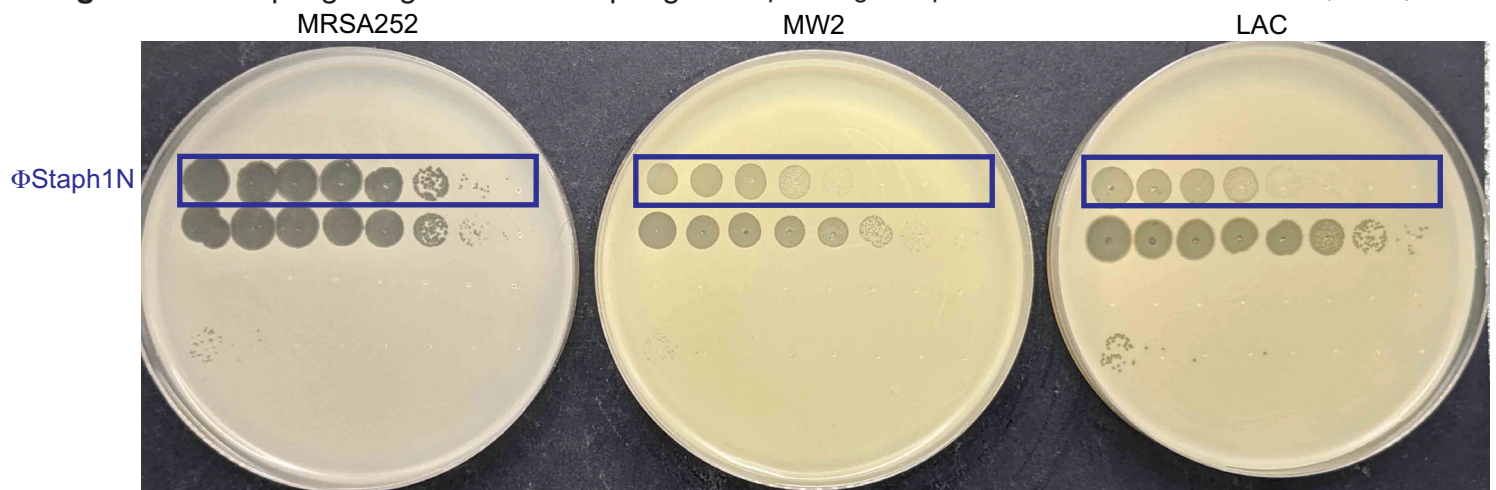

**For Figure 1B:** Plaquing images of bacteriophage  $\Phi$ Staph1N against evolved MRSA strains MRSA252, MW2, and LAC.

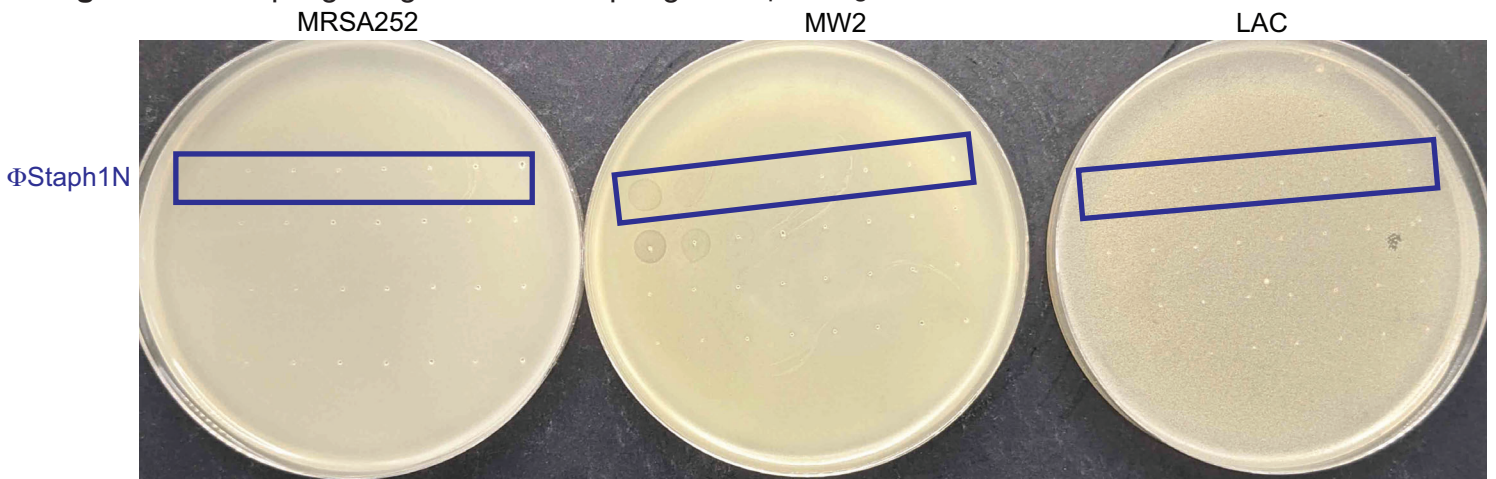

**For Figure 1C:** Uncropped images of parental and evolved MRSA strains exposed to oxacillin strips.

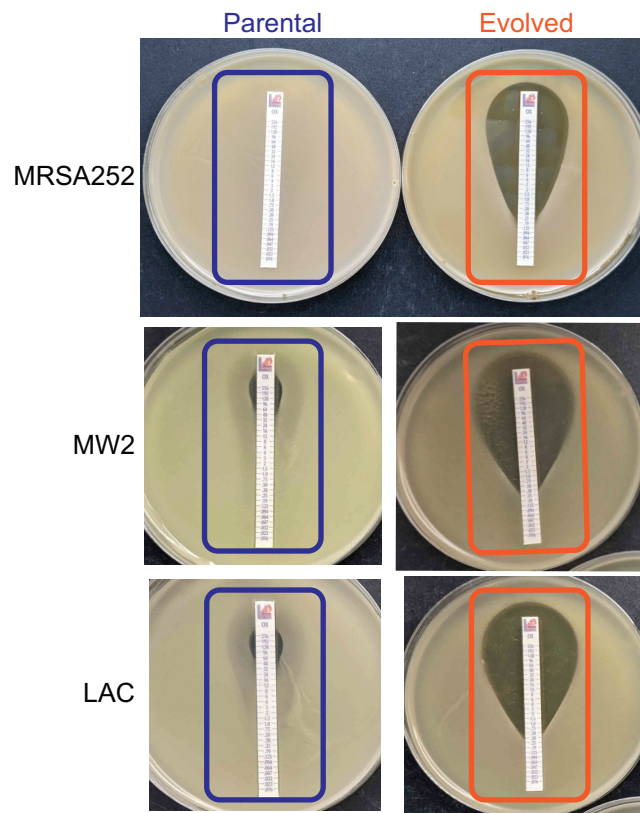

Supplement: fig1-data1 [file elife-102743-fig1-data1-v1.zip]
