# Supplementary material for: Bacteriophage infection drives loss of β-lactam resistance in methicillin-resistant Staphylococcus aureus
Source: eLife journal article supplement (doi:10.7554/elife.102743), 2024-10-25

**Figure 1-figure supplement 1-Source Data 1:** raw plaquing images of bacteriophages against MRSA strains MRSA252, MW2, and LAC. The top raw image is also found in Figure 1-Source Data 1 and Figure 2-Source Data 1

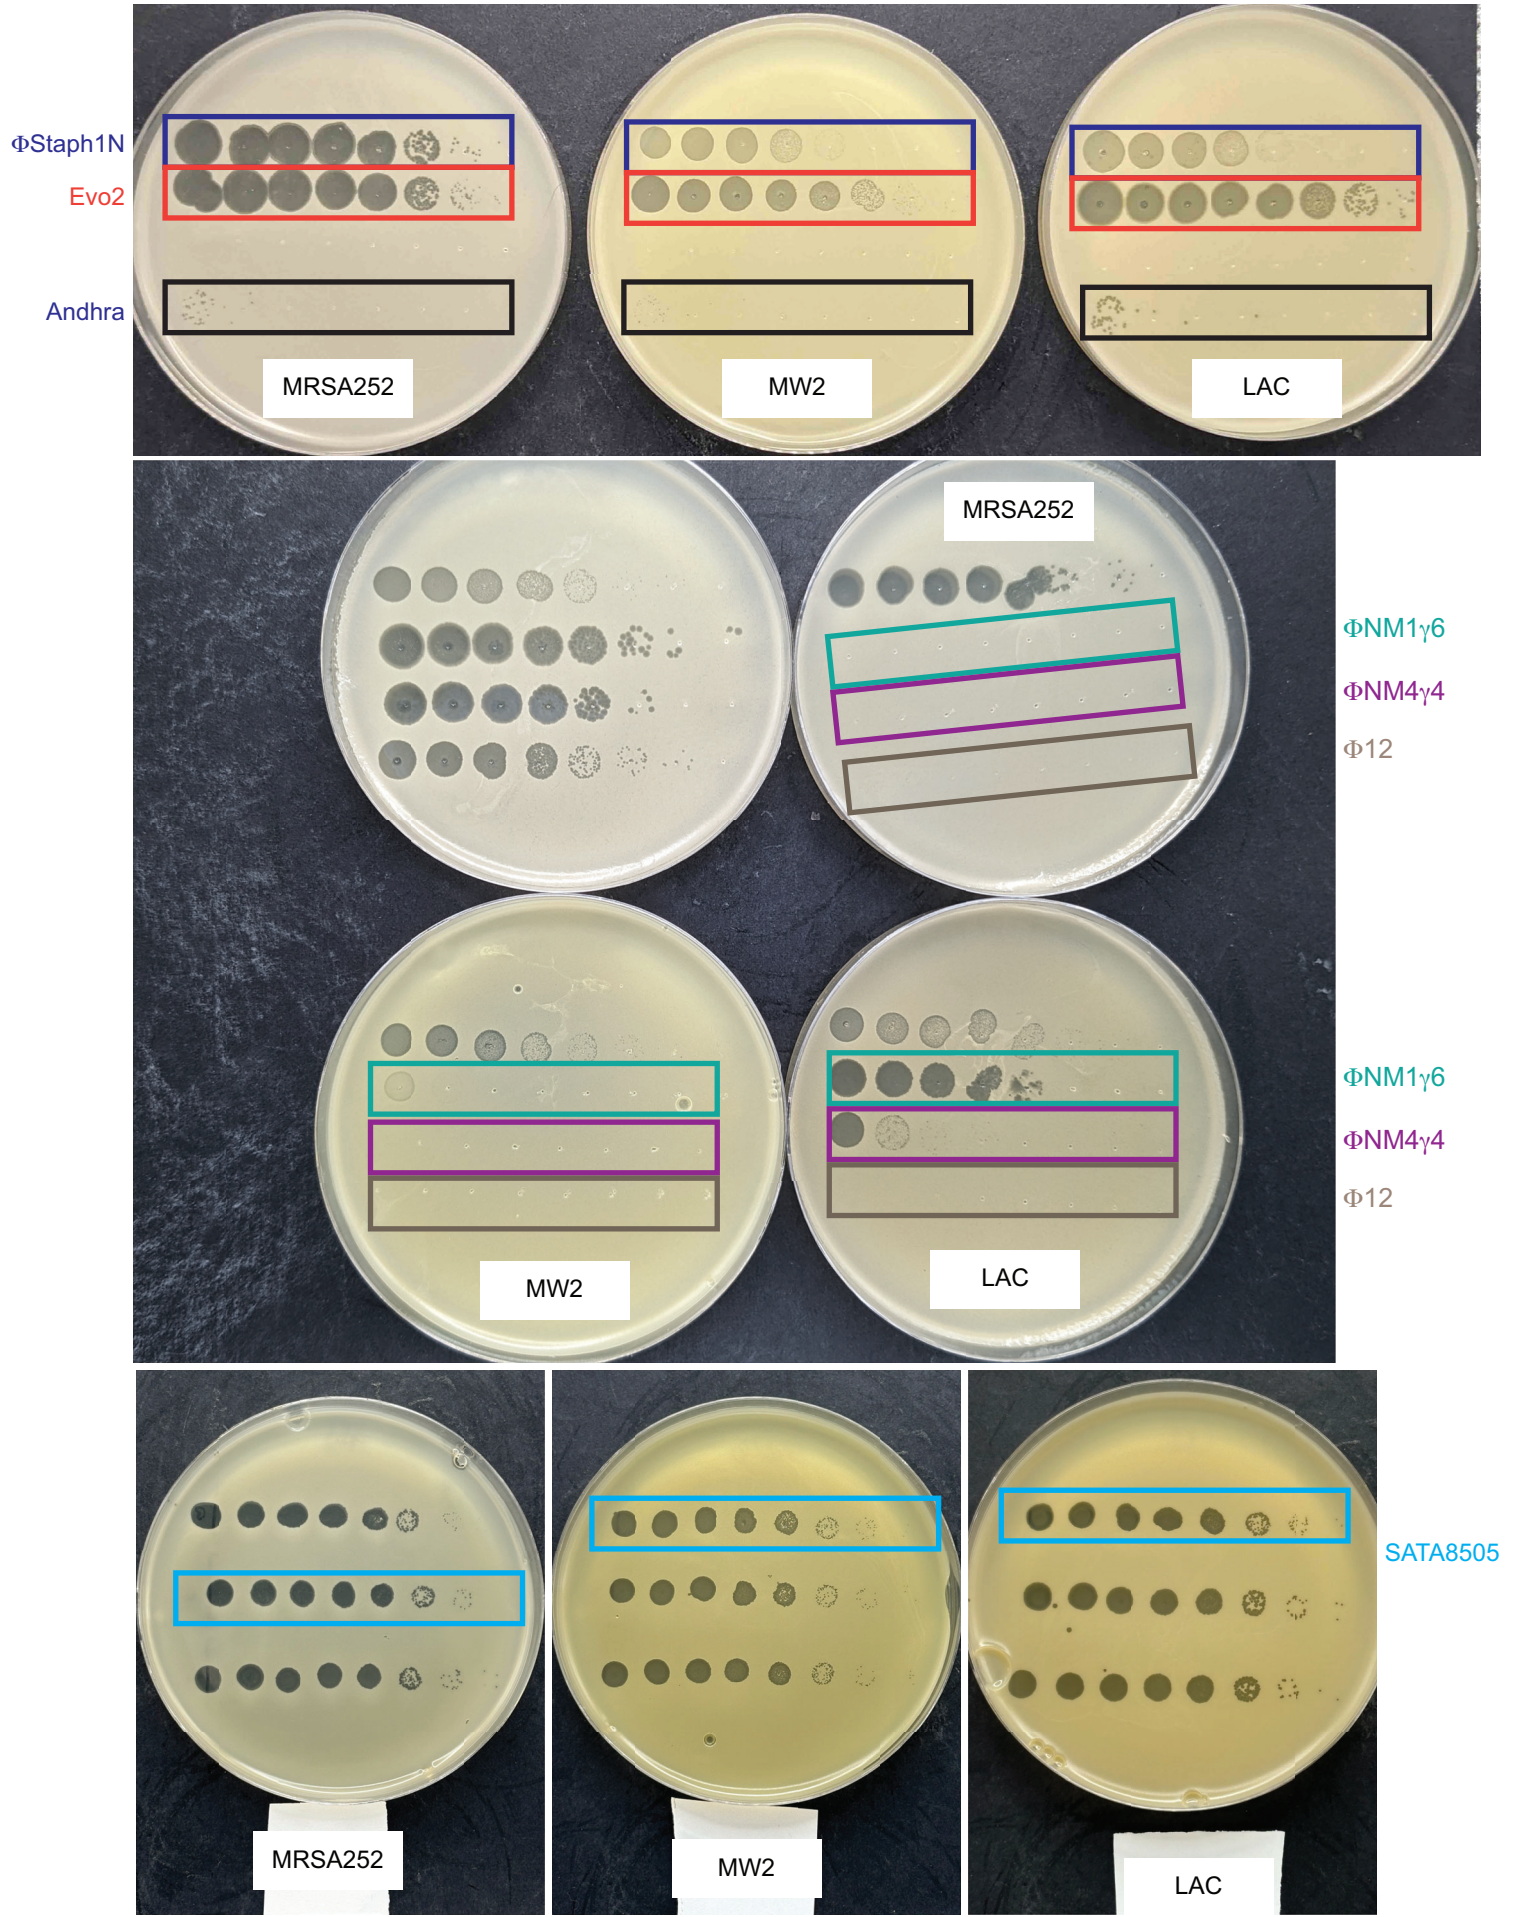

Supplement: fig1-figsupp1-data1 [file elife-102743-fig1-figsupp1-data1-v1.zip]
