# Supplementary material for: Bacteriophage infection drives loss of β-lactam resistance in methicillin-resistant Staphylococcus aureus
Source: eLife journal article supplement (doi:10.7554/elife.102743), 2024-10-25

## Figure 2- Source Data 1

**For Figure 2A:** raw plaquing images of  $\Phi$ Staph1N and Evo2 bacteriophages against MRSA strains MRSA252, MW2, and LAC. The raw image is also found in Figure 1-Source Data 1 and Figure 1-figure supplement 1-Source Data 1.

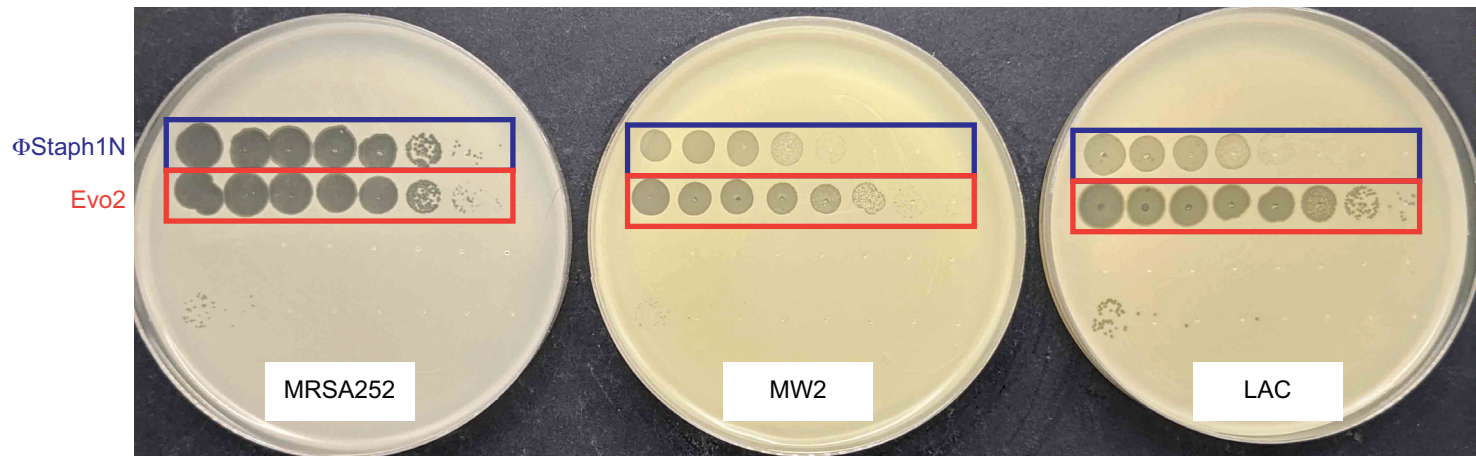

Supplement: fig2-data1 [file elife-102743-fig2-data1-v1.zip]
