# Supplementary material for: Bacteriophage infection drives loss of β-lactam resistance in methicillin-resistant Staphylococcus aureus
Source: eLife journal article supplement (doi:10.7554/elife.102743), 2024-10-25
Supplement: fig2-figsupp1-data1 [file elife-102743-fig2-figsupp1-data1-v1.zip]

## Figure 2—figure supplement 1 - Source Data 1

**For Figure 2 - figure supplement 1A:** Plaquing image of bacteriophage  $\Phi$ Staph1N against LAC.

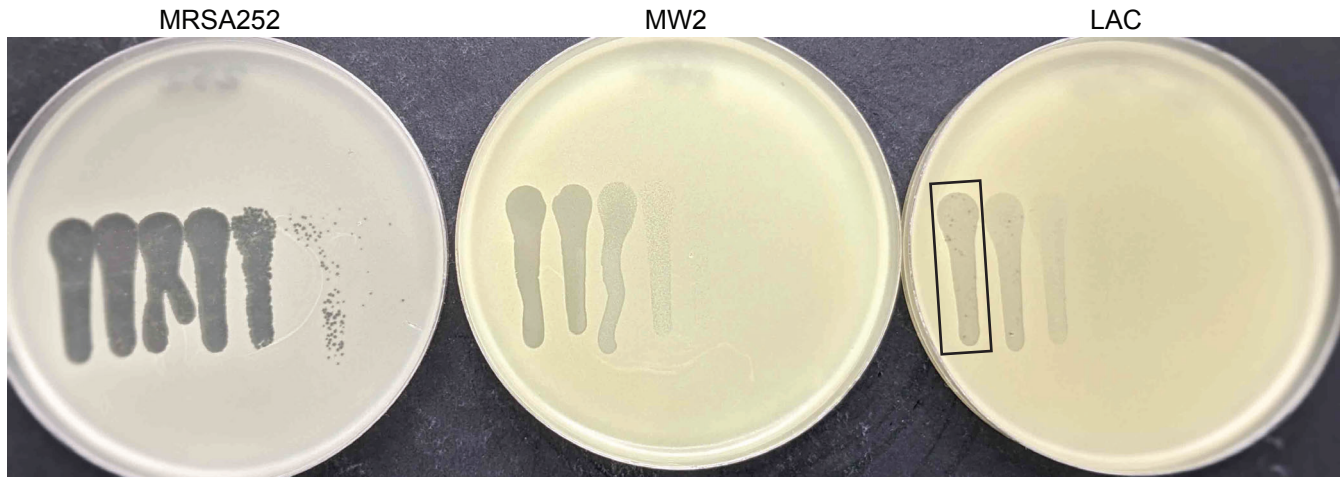

**For Figure 2 - figure supplement 1A:** the remaining plaquing images are the same as in Figure 2A and share the same Figure 2 - Source Data 1.
