# Supplementary material for: Bacteriophage infection drives loss of β-lactam resistance in methicillin-resistant Staphylococcus aureus
Source: eLife journal article supplement (doi:10.7554/elife.102743), 2024-10-25

## Figure 2—figure supplement 3 - Source Data 1

**For Figure 2 - figure supplement 3A:** Plaquing image of bacteriophage  $\Phi$ NM1 $\gamma$ 6 against parental LAC and LAC following  $\Phi$ NM1 $\gamma$ 6 infection (Evolved).

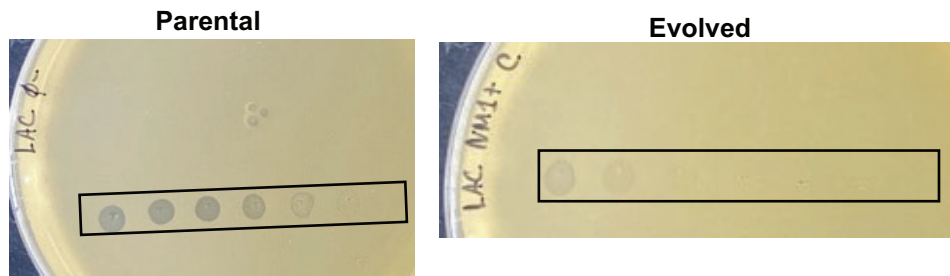

**For Figure 2 - figure supplement 3B:** images of parental and  $\Phi$ NM1 $\gamma$ 6-resistant LAC strains exposed to oxacillin strips

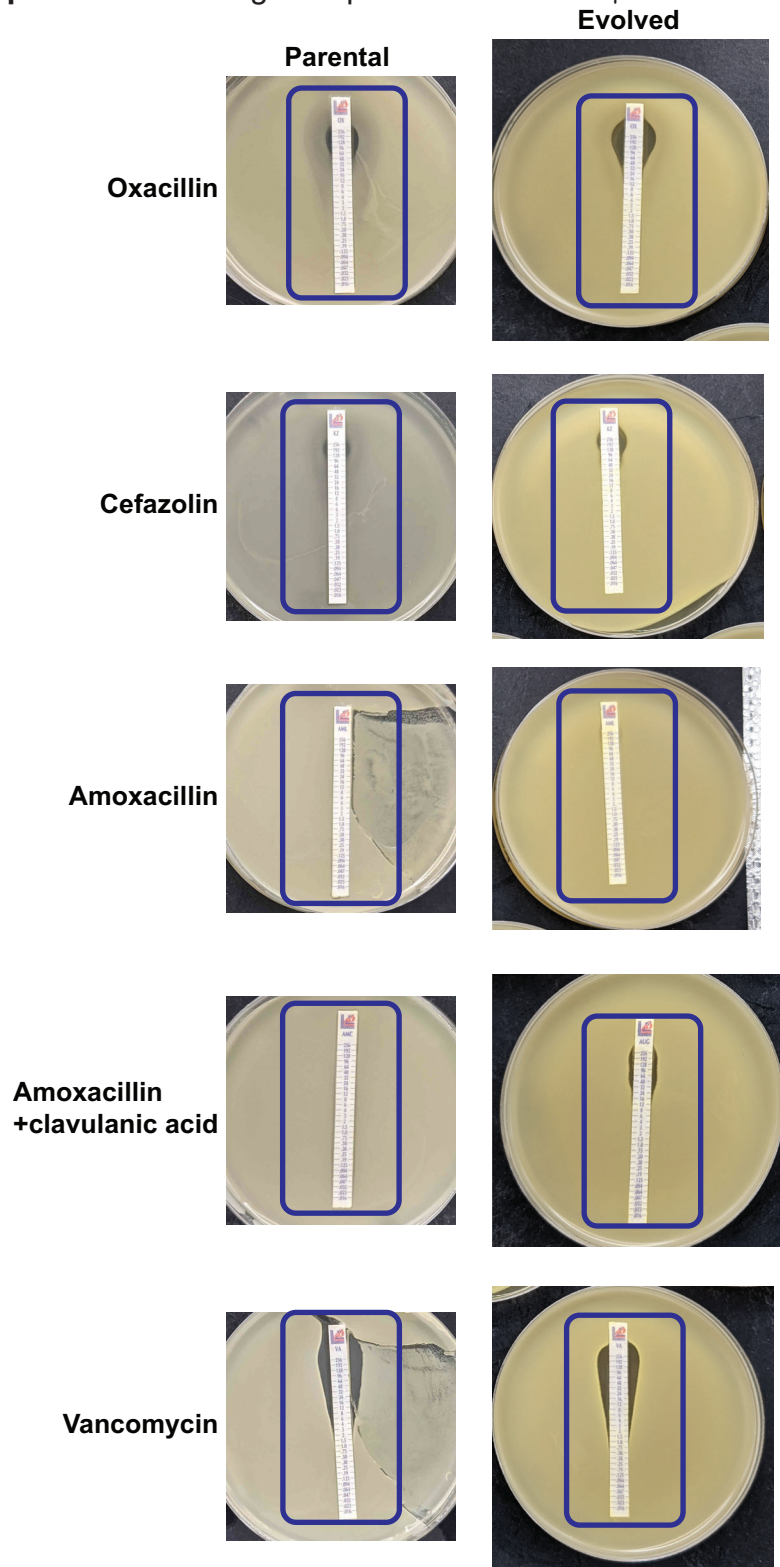

Supplement: fig2-figsupp3-data1 [file elife-102743-fig2-figsupp3-data1-v1.zip]
