# Supplementary material for: Bacteriophage infection drives loss of β-lactam resistance in methicillin-resistant Staphylococcus aureus
Source: eLife journal article supplement (doi:10.7554/elife.102743), 2024-10-25

**Figure 2-figure supplement 4-Source Data 1:**

**For Figure 2-figure supplement 4A:** raw plaquing images of bacteriophage SATA8505 against parental and evolved MRSA strains MRSA252, MW2, and LAC.

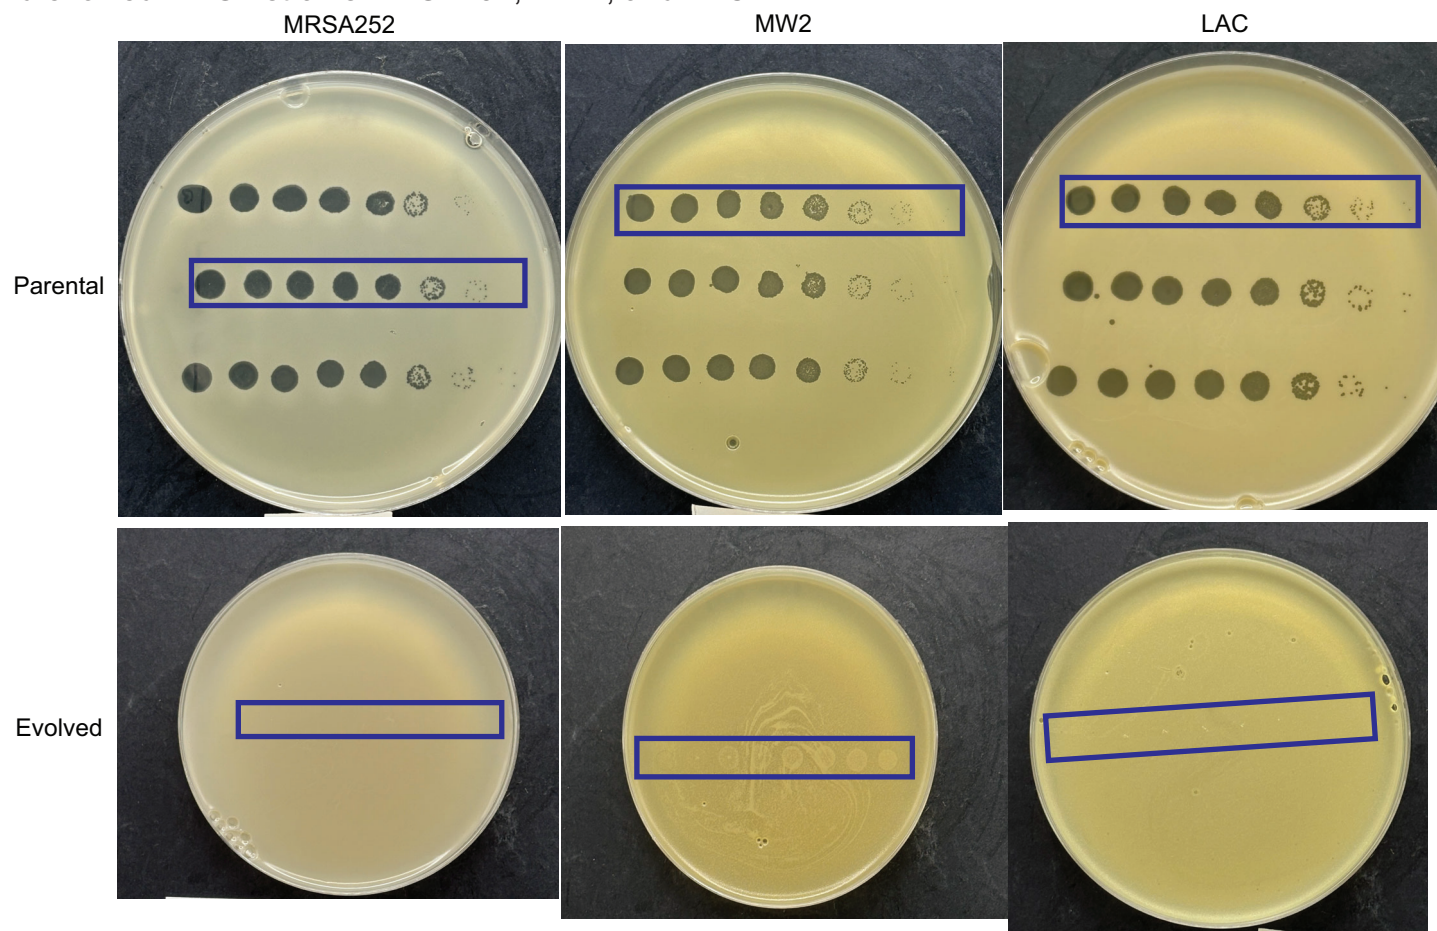

**For Figure 2-figure supplement 4B:** Uncropped images of parental and SATA8505-evolved MRSA strains exposed to oxacillin strips.

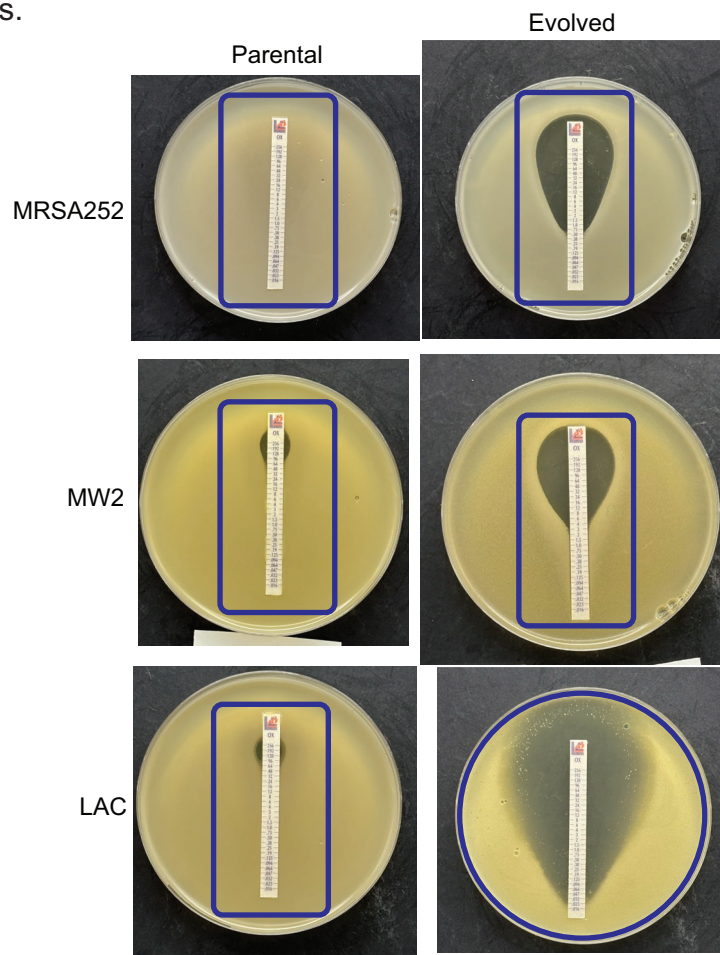

Supplement: fig2-figsupp4-data1 [file elife-102743-fig2-figsupp4-data1-v1.zip]
