# Supplementary material for: Bacteriophage infection drives loss of β-lactam resistance in methicillin-resistant Staphylococcus aureus
Source: eLife journal article supplement (doi:10.7554/elife.102743), 2024-10-25

**For Figure 3-figure supplement 2:** Plaquing images of bacteriophage  $\Phi$ Staph1N and Evo2 against mutant MW2 and LAC strains.

AH3456 (MW2 *mgrA*::tetM)

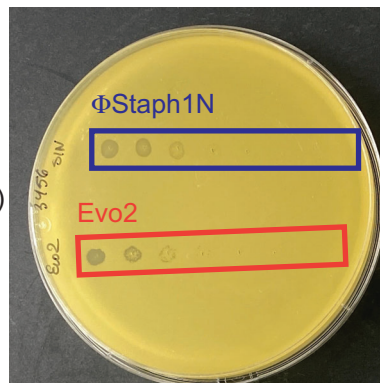

AH5679 (MW2 *sarA*::Tn(Erm))

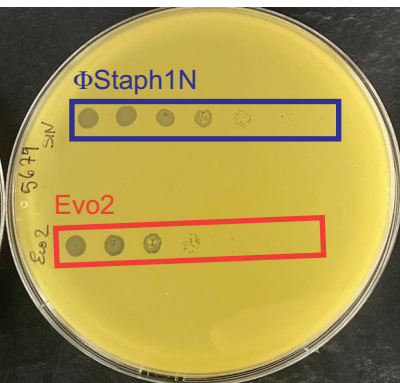

AH843 (MW2)

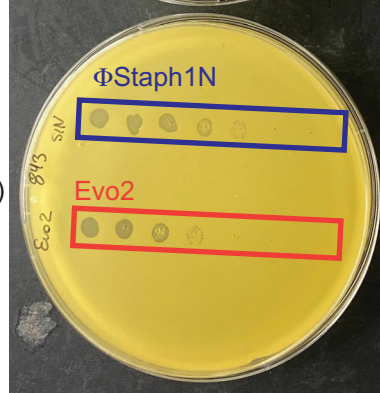

AH3060 (MW2 *arl*::tet)

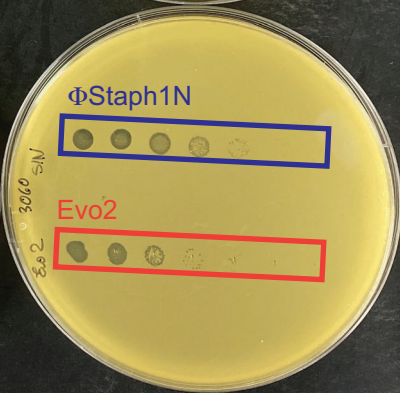

AH3455 (LAC *mgrA*::tetM)

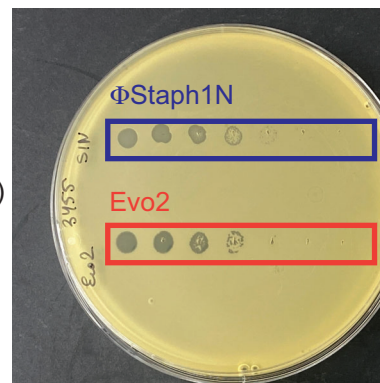

AH1975 (LAC  $\Delta arl$ )

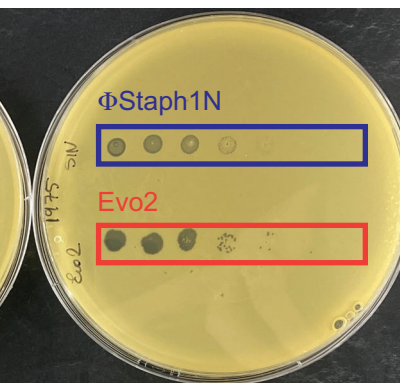

AH1263 (LAC, *erm*<sup>S</sup>)

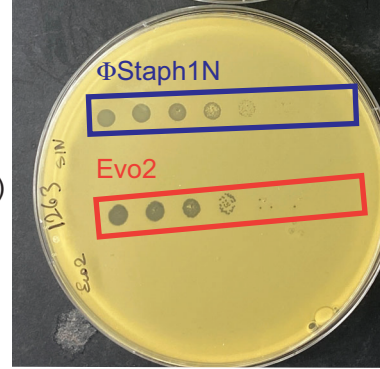

AH1525 (LAC *sarA*::kan)

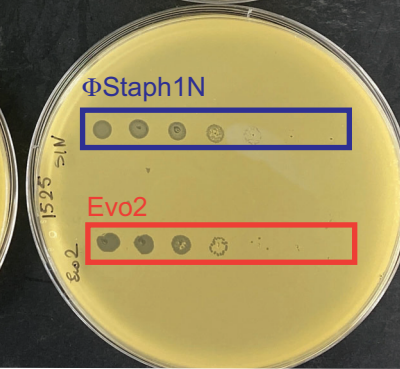

Supplement: fig3-figsupp2-data1 [file elife-102743-fig3-figsupp2-data1-v1.zip]
