# Supplementary material for: Bacteriophage infection drives loss of β-lactam resistance in methicillin-resistant Staphylococcus aureus
Source: eLife journal article supplement (doi:10.7554/elife.102743), 2024-10-25

## Figure 5 - Source Data 1

**For Figure 5A:** Uncropped images of MRSA strains MRSA252, MW2, and LAC in blood agar plates.

**MRSA252**

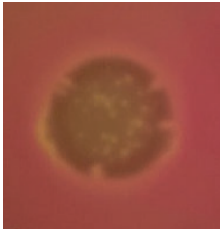

**MW2**

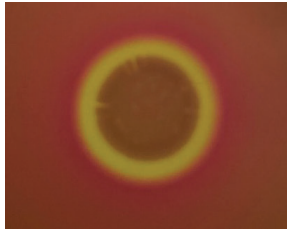

**LAC**

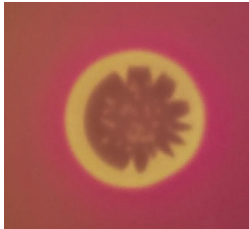

Supplement: fig5-data1 [file elife-102743-fig5-data1-v1.zip]
