# Supplementary material for: Bacteriophage infection drives loss of β-lactam resistance in methicillin-resistant Staphylococcus aureus
Source: eLife. 2025 Jul 10;13:RP102743. doi: 10.7554/eLife.102743 (PMC12245174; doi:10.7554/eLife.102743)
Supplement: Figure 1—source data 2. [file elife-102743-fig1-data2.xlsx]

## Sheet: Sheet1
Figure 1: Source data for Figure 1D
Strain	Fold reduction in MIC (treated MRSA relative to untreated MRSA); 3 independent replicates each
	OXI			CEF			AMOX			AMOX+CA			VANC
MRSA252	341.333	1024	1024	21.3333	32	21.3333	1	1	1	256	85.3333	170.667	1	1	1
MW2	256	256	341.333	1024	512	1024	1	1	1	673.684	128	256	1	1	1
LAC	32	256	256	16	8	128	1	1	1	32	16	16	2	1	0.666
