# Supplementary material for: Bacteriophage infection drives loss of β-lactam resistance in methicillin-resistant Staphylococcus aureus
Source: eLife. 2025 Jul 10;13:RP102743. doi: 10.7554/eLife.102743 (PMC12245174; doi:10.7554/eLife.102743)
Supplement: Figure 2—source data 2. [file elife-102743-fig2-data2.xlsx]

## Sheet: Sheet1
Figure 2: Source data for Figure 2B
Strain	Fold reduction in MIC (treated MRSA relative to untreated MRSA); 3 independent replicates each
	OXI			CEF			AMOX			AMOX+CA			VANC
MRSA252	512	1024	1024	64	512	673.684	1	1	1	170.667	1347.37	673.684	1.5	1.5	1
MW2	170.667	256	512	64	170.667	512	1	1	8	32	64	85.3333	3	1	1
LAC	170.667	341.333	256	170.667	128	512	1	1	1	21.3333	32	1347.37	1.5	0.5	1
Figure 2: Source data for Figure 2C
	MIC against oxacillin (µg/mL); 3 independent replicates each
Strain	Mock treated			Evo2-treated
ADL2	32	32	32	0.5	0.38	0.75
ADL3	48	96	48	0.5	1.5	2
ADL4	32	64	16	1.5	1	0.75
ADL7	32	24	64	1	0.5	0.38
ADL8	48	32	96	1.5	1	0.38
ADL10	32	48	48	1	0.38	0.38
ADL11	32	96	48	2	1	1
