# Supplementary material for: Bacteriophage infection drives loss of β-lactam resistance in methicillin-resistant Staphylococcus aureus
Source: eLife. 2025 Jul 10;13:RP102743. doi: 10.7554/eLife.102743 (PMC12245174; doi:10.7554/eLife.102743)
Supplement: Figure 5—figure supplement 1—source data 1. [file elife-102743-fig5-figsupp1-data1.xlsx]

## Sheet: Sheet1
Figure 5-figure supplement 1: Source data
		Optical density readiings (OD600) values from the Crystal Violet assay on MRSA and S. epidermidis strains; 3 independent replicates
		Parental			Mock			FStaph1N			Evo2
MRSA	MRSA252	0.150767	0.195567	0.289067	0.144167	0.256667	0.0757667	0.1298	0.1183	0.0496	0.0163	0.0276	0.0289
	MW2	0.0973667	0.0387666	0.0641667	0.100567	0.130567	0.0768667	0.131367	0.116167	0.0692666	0.114467	0.0493666	0.0206667
	LAC	0.0670667	0.0344667	0.0477667	0.0927667	0.0474667	0.0425667	0.0593667	-0.0235333	0.110767	0.159767	0.0656667	0.191067
S. epidermidis	LM1680	0.114867	0.103167	0.0443667
	RP62a	0.826267	1.10347	0.780667
