# Supplementary material for: Bacteriophage infection drives loss of β-lactam resistance in methicillin-resistant Staphylococcus aureus
Source: eLife. 2025 Jul 10;13:RP102743. doi: 10.7554/eLife.102743 (PMC12245174; doi:10.7554/eLife.102743)
Supplement: Figure 5—source data 2. [file elife-102743-fig5-data2.xlsx]

## Sheet: Sheet1
Figure 5: Source data for Figure 5B
	Hemolysis area (mm^2); 3 independent replicates
Treatment	MW2			LAC
No phage	73.8904	68.212	77.7546	224.624	235.746	232.227
FStaph1N	27.1434	18	18	72.7359	87.92	47.5
Evo2	27.2769	18.3469	1.4375	0	0	4.46107
