# Supplementary material for: Bacteriophage infection drives loss of β-lactam resistance in methicillin-resistant Staphylococcus aureus
Source: eLife. 2025 Jul 10;13:RP102743. doi: 10.7554/eLife.102743 (PMC12245174; doi:10.7554/eLife.102743)
Supplement: Supplementary file 2. [file elife-102743-supp2.xlsx]

## Sheet: LF_MW2_significant_genes_0.002_
Gene	Sample	log2FoldChange	p-value	p-value, adj.	Regulation
DBIAII_00174=PBCCJM_00186	MW2	-4.47527	2.86009e-07	1.46669e-06	downregulated
DBIAII_00175=PBCCJM_00187	MW2	-3.80192	1.40548e-05	5.70593e-05	downregulated
DBIAII_00176=PBCCJM_00188	MW2	-5.23057	4.96773e-27	1.13599e-25	downregulated
DBIAII_00177=PBCCJM_00189	MW2	-5.38276	1.09376e-32	2.95316e-31	downregulated
DBIAII_00178=PBCCJM_00190	MW2	-5.90813	5.99074e-12	5.14377e-11	downregulated
DBIAII_00179=PBCCJM_00191	MW2	-6.24678	1.95615e-32	5.21872e-31	downregulated
DBIAII_00183=PBCCJM_00195	MW2	-6.53367	4.91661e-14	4.87528e-13	downregulated
DBIAII_00190=PBCCJM_00202	MW2	-5.14027	5.17769e-33	1.46876e-31	downregulated
DBIAII_00256=PBCCJM_00269	MW2	2.46518	5.12118e-17	6.27135e-16	upregulated
DBIAII_00461=PBCCJM_00477	MW2	2.44212	1.38356e-40	5.34581e-39	upregulated
DBIAII_00467=PBCCJM_00482	MW2	8.47703	1.71509e-204	4.27057e-202	upregulated
DBIAII_00594=PBCCJM_00608	MW2	2.76049	5.7311e-20	8.67796e-19	upregulated
DBIAII_00595=PBCCJM_00609	MW2	2.43335	3.39864e-35	1.07273e-33	upregulated
DBIAII_00603=PBCCJM_00617	MW2	2.39825	1.37969e-88	1.23675e-86	upregulated
DBIAII_00607=PBCCJM_00621	MW2	-4.60967	0.000386732	0.00122584	downregulated
DBIAII_00608=PBCCJM_00622	MW2	-3.9222	1.24463e-11	1.05253e-10	downregulated
DBIAII_00998=PBCCJM_01016	MW2	-2.54195	4.4028e-86	3.65432e-84	downregulated
DBIAII_00998=PBCCJM_01017	MW2	-2.54195	4.4028e-86	3.65432e-84	downregulated
DBIAII_00999=PBCCJM_00948	MW2	-3.79574	2.55624e-79	2.0459e-77	downregulated
DBIAII_00999=PBCCJM_01018	MW2	-3.79574	2.55624e-79	2.0459e-77	downregulated
DBIAII_01132=PBCCJM_01149	MW2	-2.0183	1.77596e-06	8.29149e-06	downregulated
DBIAII_01158=PBCCJM_01175	MW2	2.53597	9.96574e-26	2.06789e-24	upregulated
DBIAII_01189=PBCCJM_01206	MW2	2.02051	9.13187e-37	3.05441e-35	upregulated
DBIAII_01714=PBCCJM_01760	MW2	-2.60039	1.99045e-10	1.49685e-09	downregulated
DBIAII_02017=PBCCJM_02076	MW2	-2.01026	1.64789e-18	2.18516e-17	downregulated
DBIAII_02021=PBCCJM_02080	MW2	9.45076	2.58828e-257	1.16007e-254	upregulated
DBIAII_02211=PBCCJM_02269	MW2	3.51505	1.7971e-71	1.25853e-69	upregulated
DBIAII_02313=PBCCJM_02405	MW2	-2.60631	2.38508e-47	1.09081e-45	downregulated
DBIAII_02313=PBCCJM_02408	MW2	-2.60631	2.38508e-47	1.09081e-45	downregulated
DBIAII_02313=PBCCJM_02409	MW2	-2.60631	2.38508e-47	1.09081e-45	downregulated
DBIAII_02340=PBCCJM_02433	MW2	-2.15369	8.67783e-33	2.40087e-31	downregulated
DBIAII_02343=PBCCJM_02436	MW2	3.74137	1.74288e-123	2.78986e-121	upregulated
DBIAII_02346=PBCCJM_02439	MW2	2.42351	6.84352e-24	1.3221e-22	upregulated
DBIAII_02368=PBCCJM_02462	MW2	-4.74106	1.58668e-29	3.74289e-28	downregulated
DBIAII_02391=PBCCJM_02484	MW2	2.20373	4.46857e-09	2.82086e-08	upregulated
DBIAII_02497=PBCCJM_02580	MW2	4.51889	3.62193e-133	6.24366e-131	upregulated
DBIAII_02505=PBCCJM_02592	MW2	-2.38735	2.12678e-44	8.99268e-43	downregulated
DBIAII_02650=PBCCJM_02740	MW2	-3.29385	1.68867e-73	1.22075e-71	downregulated
DBIAII_02651=PBCCJM_02741	MW2	-3.11031	3.34962e-66	2.2747e-64	downregulated
DBIAII_02652=PBCCJM_02742	MW2	-2.62945	1.22229e-52	5.95467e-51	downregulated
ebh	MW2	7.12649	0	0	upregulated
sarU	MW2	9.72757	0	0	upregulated
lytN	MW2	7.47441	9.68148e-298	7.23207e-295	upregulated
tarM	MW2	6.63019	5.00643e-292	2.80485e-289	upregulated
fmhC	MW2	5.61582	4.10746e-223	1.53414e-220	upregulated
efeO	MW2	4.02598	2.34303e-214	7.50103e-212	upregulated
sarV	MW2	4.1519	9.14856e-214	2.56274e-211	upregulated
sdrD	MW2	4.80386	8.3689e-185	1.87547e-182	upregulated
efeB	MW2	4.23792	5.85074e-181	1.19196e-178	upregulated
sarT	MW2	6.69963	1.49259e-179	2.78741e-177	upregulated
yut	MW2	2.34355	1.72411e-113	2.57582e-111	upregulated
spa	MW2	8.38896	2.94826e-112	4.12941e-110	upregulated
fTR1	MW2	4.03551	1.31726e-104	1.73645e-102	upregulated
ureF	MW2	3.81496	1.82884e-99	2.27691e-97	upregulated
hysA	MW2	-2.88943	4.28277e-99	5.05141e-97	downregulated
ureA	MW2	4.99234	4.85504e-97	5.44007e-95	upregulated
gLY1	MW2	3.07877	6.31005e-96	6.73372e-94	upregulated
ureG	MW2	3.34204	1.32577e-95	1.35048e-93	upregulated
ureD	MW2	3.37452	6.92719e-92	6.74949e-90	upregulated
capA	MW2	4.02568	6.4513e-91	6.0239e-89	upregulated
wcaJ	MW2	4.04833	1.55904e-88	1.34378e-86	upregulated
ureC	MW2	4.27721	3.12997e-78	2.41871e-76	upregulated
fmtB	MW2	2.94891	2.34135e-75	1.74899e-73	upregulated
argF	MW2	-2.01201	6.11695e-66	4.03179e-64	downregulated
lpl9	MW2	-3.6664	3.2428e-65	2.07632e-63	downregulated
sarS	MW2	3.20319	4.0977e-65	2.55082e-63	upregulated
msaC	MW2	2.851	4.73107e-64	2.86549e-62	upregulated
ureE	MW2	3.79249	4.19204e-62	2.4722e-60	upregulated
arcA	MW2	-2.85946	4.87129e-61	2.66257e-59	downregulated
sdrE	MW2	-3.02703	1.08449e-59	5.78652e-58	downregulated
ureB	MW2	4.73147	2.09756e-55	1.09317e-53	upregulated
crtN	MW2	-2.83953	4.66014e-54	2.37349e-52	downregulated
DBIAII_02627	MW2	2.28149	7.23193e-54	3.6015e-52	upregulated
esaE	MW2	-2.66845	1.36624e-50	6.51434e-49	downregulated
metN1	MW2	-2.11119	1.04804e-44	4.6052e-43	downregulated
DBIAII_02296	MW2	-2.24486	1.65963e-44	7.15238e-43	downregulated
cap8D	MW2	-3.71073	2.73992e-44	1.13707e-42	downregulated
DBIAII_02618	MW2	-2.52785	5.90556e-44	2.40625e-42	downregulated
tatC	MW2	2.29115	7.14637e-44	2.85983e-42	upregulated
ywqE	MW2	3.53763	1.45833e-39	5.53919e-38	upregulated
esaA	MW2	-2.65146	1.16458e-38	4.3497e-37	downregulated
dprA	MW2	2.81125	3.28799e-38	1.20793e-36	upregulated
sraP	MW2	2.24714	1.11604e-37	3.96992e-36	upregulated
cwrA	MW2	4.31719	1.34443e-37	4.70761e-36	upregulated
ldhD	MW2	4.08982	3.06592e-36	1.0104e-34	upregulated
cap8E	MW2	-2.7511	3.2366e-36	1.05119e-34	downregulated
psmA4	MW2	-5.06682	4.23089e-34	1.26419e-32	downregulated
essA	MW2	-2.58354	2.91976e-32	7.60834e-31	downregulated
feoA	MW2	4.26406	3.43048e-32	8.83644e-31	upregulated
sasC	MW2	2.60317	4.81175e-32	1.22536e-30	upregulated
arcD	MW2	-2.0316	8.95916e-31	2.20632e-29	downregulated
cap8B	MW2	-3.45805	8.89139e-30	2.11974e-28	downregulated
ceuD	MW2	2.21701	1.85335e-27	4.28182e-26	upregulated
sceD	MW2	-2.28311	5.16014e-27	1.16807e-25	downregulated
crtM	MW2	-2.82086	8.47842e-27	1.8812e-25	downregulated
lytR	MW2	-2.2384	3.46638e-26	7.46937e-25	downregulated
ydhF	MW2	-5.444	4.19901e-26	8.87734e-25	downregulated
lrgA	MW2	-3.85809	6.83557e-26	1.43164e-24	downregulated
cap8G	MW2	-2.50216	1.45257e-24	2.93262e-23	downregulated
tenA	MW2	2.33263	2.86495e-23	5.48748e-22	upregulated
secY2	MW2	2.1856	2.90242e-23	5.51214e-22	upregulated
ykoE	MW2	2.50781	3.44947e-23	6.44189e-22	upregulated
hfq	MW2	2.21938	9.86582e-23	1.7975e-21	upregulated
lip1	MW2	-2.76417	1.27738e-22	2.30855e-21	downregulated
cap8C	MW2	-3.55745	3.28009e-22	5.78793e-21	downregulated
ppnN	MW2	-5.45477	4.84967e-22	8.23341e-21	downregulated
ssaA	MW2	-2.44732	1.55554e-21	2.5822e-20	downregulated
thiE	MW2	2.03208	3.60335e-21	5.85153e-20	upregulated
ftnA	MW2	-2.51072	3.8914e-21	6.27384e-20	downregulated
pyrB	MW2	-2.11803	4.3938e-21	6.98334e-20	downregulated
metL1	MW2	-3.61581	4.72433e-21	7.45579e-20	downregulated
esxA	MW2	-2.13561	9.07184e-21	1.40207e-19	downregulated
thiM	MW2	2.03194	7.79188e-20	1.16411e-18	upregulated
essC	MW2	-2.02319	1.14257e-19	1.67354e-18	downregulated
uraA	MW2	-2.40016	5.59241e-19	7.93201e-18	downregulated
trpF	MW2	-2.58886	8.65713e-19	1.21254e-17	downregulated
lytS	MW2	-2.41393	1.25175e-18	1.72096e-17	downregulated
cntL	MW2	-2.14435	1.39392e-18	1.88179e-17	downregulated
crtQ	MW2	-2.86936	5.16174e-18	6.64797e-17	downregulated
essB	MW2	-2.02106	9.67625e-18	1.23911e-16	downregulated
esxD	MW2	-2.58219	1.70338e-17	2.1207e-16	downregulated
thiD	MW2	2.08699	2.18079e-17	2.70008e-16	upregulated
mtlD	MW2	-2.077	5.25236e-17	6.39703e-16	downregulated
lrgB	MW2	-3.10636	5.88567e-17	7.12962e-16	downregulated
argG	MW2	-3.32567	6.39244e-17	7.70186e-16	downregulated
ceuC	MW2	2.50999	1.11793e-16	1.31857e-15	upregulated
seh	MW2	-3.15146	1.57728e-16	1.83144e-15	downregulated
asp1	MW2	2.12818	2.26917e-16	2.58287e-15	upregulated
agrA	MW2	-3.5259	3.31806e-16	3.73657e-15	downregulated
dapB	MW2	-2.40451	1.9734e-15	2.16784e-14	downregulated
aur	MW2	-2.13238	2.68312e-15	2.9331e-14	downregulated
ceuB	MW2	2.63158	9.77764e-15	1.02872e-13	upregulated
trpC	MW2	-3.01251	2.20352e-14	2.26517e-13	downregulated
pstS	MW2	2.8239	2.94012e-14	2.98136e-13	upregulated
ehuA	MW2	-2.65494	4.2108e-14	4.21268e-13	downregulated
agrB	MW2	-3.97126	5.39493e-14	5.32601e-13	downregulated
cap8F	MW2	-2.28359	9.20906e-14	9.05154e-13	downregulated
natK	MW2	-3.89501	3.47281e-13	3.25994e-12	downregulated
yaiI	MW2	-5.84159	2.07337e-12	1.85857e-11	downregulated
esxB	MW2	-2.30371	4.7036e-12	4.11749e-11	downregulated
agrD	MW2	-3.17313	1.56955e-11	1.30757e-10	downregulated
argH	MW2	-2.7166	2.02109e-11	1.66517e-10	downregulated
lacA	MW2	2.0311	2.86514e-11	2.34335e-10	upregulated
asd	MW2	-3.62068	3.07701e-11	2.50749e-10	downregulated
cydD	MW2	-5.50279	1.85507e-10	1.40447e-09	downregulated
dapA	MW2	-2.85766	3.27843e-10	2.36999e-09	downregulated
nrdD	MW2	-2.34269	3.29665e-10	2.3755e-09	downregulated
amaP	MW2	-2.55239	3.99038e-10	2.86617e-09	downregulated
fetB	MW2	-2.37347	6.17712e-10	4.31244e-09	downregulated
pstC	MW2	2.13459	8.51683e-10	5.83676e-09	upregulated
uppP	MW2	-5.40878	9.33439e-10	6.37755e-09	downregulated
vraX	MW2	2.07768	3.19353e-09	2.05063e-08	upregulated
psmA3	MW2	-5.12262	3.85189e-09	2.45929e-08	downregulated
cydC	MW2	-5.11074	4.27794e-09	2.71583e-08	downregulated
hld	MW2	-6.48005	6.5766e-09	4.12834e-08	downregulated
opp3C	MW2	-2.26937	1.54657e-08	9.3926e-08	downregulated
psmA2	MW2	-7.27512	1.70573e-08	1.02481e-07	downregulated
crtP	MW2	-2.03776	4.00828e-08	2.30322e-07	downregulated
asp23	MW2	-2.10684	1.60533e-07	8.5656e-07	downregulated
mgrA	MW2	-4.94973	2.13297e-06	9.89647e-06	downregulated
DBIAII_00256=PBCCJM_00269	LAC	5.99771	3.39341e-43	9.58846e-42	upregulated
DBIAII_00305=PBCCJM_00303	LAC	-3.15803	5.33619e-15	5.54438e-14	downregulated
DBIAII_00401=PBCCJM_00416	LAC	2.49655	5.60046e-29	1.12837e-27	upregulated
DBIAII_00461=PBCCJM_00477	LAC	4.54247	0	0	upregulated
DBIAII_00594=PBCCJM_00608	LAC	3.83303	1.68996e-26	3.08319e-25	upregulated
DBIAII_00595=PBCCJM_00609	LAC	3.20254	3.32131e-51	1.2215e-49	upregulated
DBIAII_00646=PBCCJM_00662	LAC	-2.09358	1.51222e-53	5.93867e-52	downregulated
DBIAII_00745=PBCCJM_00760	LAC	4.52384	7.89053e-44	2.34389e-42	upregulated
DBIAII_00746=PBCCJM_00761	LAC	2.14149	4.22922e-34	9.99907e-33	upregulated
DBIAII_00846=PBCCJM_01758	LAC	-2.18489	6.03016e-07	2.90476e-06	downregulated
DBIAII_00931=PBCCJM_01018	LAC	-3.44943	4.79724e-115	5.29295e-113	downregulated
DBIAII_00998=PBCCJM_01017	LAC	-3.33351	1.31684e-125	1.60586e-123	downregulated
DBIAII_00999=PBCCJM_01018	LAC	-3.44943	4.79724e-115	5.29295e-113	downregulated
DBIAII_01132=PBCCJM_01149	LAC	-2.83919	2.9973e-05	0.00011517	downregulated
DBIAII_01291=PBCCJM_01317	LAC	2.20866	4.44895e-17	5.42537e-16	upregulated
DBIAII_01322=PBCCJM_01351	LAC	2.0362	2.19991e-35	5.36547e-34	upregulated
DBIAII_01476=PBCCJM_01506	LAC	-2.21922	4.33871e-15	4.54878e-14	downregulated
DBIAII_01683=PBCCJM_01723	LAC	8.28583	1.39644e-187	2.48888e-185	upregulated
DBIAII_01714=PBCCJM_01760	LAC	-4.61767	1.35621e-05	5.51287e-05	downregulated
DBIAII_01820=PBCCJM_01874	LAC	3.93366	2.68011e-43	7.66643e-42	upregulated
DBIAII_01982=PBCCJM_02038	LAC	-2.43916	1.92403e-12	1.5642e-11	downregulated
DBIAII_01998=PBCCJM_02054	LAC	-2.32916	5.45254e-15	5.63328e-14	downregulated
DBIAII_02017=PBCCJM_02076	LAC	-3.66463	4.29933e-18	5.69231e-17	downregulated
DBIAII_02018=PBCCJM_02077	LAC	-3.19651	1.28144e-13	1.1598e-12	downregulated
DBIAII_02019=PBCCJM_02078	LAC	-3.50693	1.0762e-14	1.08416e-13	downregulated
DBIAII_02052=PBCCJM_02112	LAC	3.1996	3.42029e-44	1.0292e-42	upregulated
DBIAII_02113=PBCCJM_02173	LAC	-3.49677	4.30196e-108	4.15319e-106	downregulated
DBIAII_02114=PBCCJM_02174	LAC	-3.3617	3.73908e-111	3.76672e-109	downregulated
DBIAII_02115=PBCCJM_02175	LAC	-3.51198	3.56452e-83	2.58094e-81	downregulated
DBIAII_02169=PBCCJM_02227	LAC	2.85897	8.92145e-45	2.71987e-43	upregulated
DBIAII_02211=PBCCJM_02269	LAC	4.03638	3.2722e-278	6.89245e-276	upregulated
DBIAII_02222=PBCCJM_02281	LAC	-3.29855	1.50976e-12	1.24488e-11	downregulated
DBIAII_02226=PBCCJM_02284	LAC	-2.02013	3.66082e-05	0.000138144	downregulated
DBIAII_02278=PBCCJM_01758	LAC	-2.18489	6.03016e-07	2.90476e-06	downregulated
DBIAII_02313=PBCCJM_02405	LAC	-2.42875	1.00916e-16	1.20861e-15	downregulated
DBIAII_02315=PBCCJM_02405	LAC	-2.42875	1.00916e-16	1.20861e-15	downregulated
DBIAII_02343=PBCCJM_02436	LAC	8.47847	0	0	upregulated
DBIAII_02346=PBCCJM_02439	LAC	6.82117	0	0	upregulated
DBIAII_02359=PBCCJM_02452	LAC	3.578	6.35839e-23	1.03024e-21	upregulated
DBIAII_02372=PBCCJM_02465	LAC	-2.60357	9.72717e-18	1.2591e-16	downregulated
DBIAII_02502=PBCCJM_02587	LAC	-2.22279	2.65131e-80	1.75517e-78	downregulated
DBIAII_02503=PBCCJM_02588	LAC	-2.44018	5.23172e-98	4.66227e-96	downregulated
DBIAII_02504=PBCCJM_02589	LAC	-3.71406	6.7483e-19	9.30703e-18	downregulated
DBIAII_02505=PBCCJM_02592	LAC	-3.59498	2.98844e-24	5.20617e-23	downregulated
DBIAII_02650=PBCCJM_02740	LAC	-2.1223	4.98915e-51	1.80623e-49	downregulated
DBIAII_02651=PBCCJM_02741	LAC	-2.05642	3.2943e-41	8.97988e-40	downregulated
ebh	LAC	8.96697	0	0	upregulated
sarV	LAC	6.03305	0	0	upregulated
fmhA	LAC	4.09525	0	0	upregulated
ywqE	LAC	7.61706	0	0	upregulated
wcaJ	LAC	8.56546	0	0	upregulated
rfbX	LAC	5.0525	0	0	upregulated
capA	LAC	6.55214	8.65184e-305	2.00463e-302	upregulated
sak	LAC	-4.41191	1.98148e-215	3.82592e-213	downregulated
gLY1	LAC	5.45408	3.62107e-184	5.99288e-182	upregulated
marR	LAC	2.23036	3.49202e-178	5.39401e-176	upregulated
ldhD	LAC	4.53619	7.20103e-174	1.0428e-171	upregulated
fmtB	LAC	7.62078	4.45969e-141	6.0783e-139	upregulated
lytN	LAC	7.59742	6.24836e-128	8.04303e-126	upregulated
phnD	LAC	6.78493	9.07134e-121	1.05091e-118	upregulated
ureC	LAC	5.09372	5.55826e-113	5.85386e-111	upregulated
phnC	LAC	6.31386	2.22345e-107	2.06069e-105	upregulated
splD	LAC	5.28578	1.2094e-97	1.03785e-95	upregulated
ureB	LAC	5.71075	7.26768e-89	6.01401e-87	upregulated
hfq	LAC	3.04496	1.14653e-88	9.1604e-87	upregulated
fmhC	LAC	5.99557	3.49038e-87	2.69573e-85	upregulated
mrp	LAC	2.06627	4.51828e-85	3.37705e-83	upregulated
phnE	LAC	5.11643	1.81501e-82	1.27435e-80	upregulated
yut	LAC	3.92982	1.3898e-81	9.47105e-80	upregulated
ureE	LAC	4.05302	9.40548e-79	5.88986e-77	upregulated
ureA	LAC	6.43251	5.77434e-74	3.52083e-72	upregulated
opp4A	LAC	8.68851	1.0535e-72	6.25885e-71	upregulated
essB	LAC	-3.07964	1.79459e-66	1.03952e-64	downregulated
msaC	LAC	3.76191	2.59575e-66	1.46691e-64	upregulated
pyrC	LAC	-3.16175	6.66309e-66	3.6758e-64	downregulated
splE	LAC	4.7448	1.57875e-65	8.50689e-64	upregulated
esaA	LAC	-3.46947	1.03497e-64	5.32896e-63	downregulated
splA	LAC	5.39968	1.31824e-63	6.49865e-62	upregulated
ureF	LAC	4.22302	7.55046e-63	3.64467e-61	upregulated
ureD	LAC	3.528	1.31843e-61	6.19047e-60	upregulated
splB	LAC	5.48258	3.0832e-56	1.34788e-54	upregulated
ureG	LAC	3.21613	3.1495e-56	1.35137e-54	upregulated
splC	LAC	5.1004	5.34414e-56	2.25134e-54	upregulated
splF	LAC	4.32119	6.75567e-56	2.79516e-54	upregulated
irrE	LAC	2.272	4.75063e-53	1.83454e-51	upregulated
essE	LAC	-3.11432	1.70412e-50	6.07452e-49	downregulated
sarT	LAC	-2.75457	6.41433e-50	2.25182e-48	downregulated
clfB	LAC	-3.74826	1.92638e-49	6.66184e-48	downregulated
fnbA	LAC	-3.57515	3.25464e-48	1.10897e-46	downregulated
lukE	LAC	4.12752	1.10701e-47	3.71732e-46	upregulated
miaA	LAC	2.4951	1.08149e-46	3.57973e-45	upregulated
PBCCJM_02590	LAC	-3.10552	4.77706e-46	1.55894e-44	downregulated
brkB	LAC	-2.39405	2.90311e-45	9.34238e-44	downregulated
lukH	LAC	-4.04617	5.98462e-45	1.87383e-43	downregulated
isaB	LAC	2.6979	7.029e-45	2.17149e-43	upregulated
PBCCJM_02591	LAC	-2.40055	1.07991e-43	3.16727e-42	downregulated
essA	LAC	-3.46889	1.93147e-43	5.59402e-42	downregulated
esxC	LAC	-3.299	1.51199e-42	4.22081e-41	downregulated
pyrB	LAC	-3.25608	5.05952e-42	1.39558e-40	downregulated
lukD	LAC	3.86148	1.06862e-40	2.87905e-39	upregulated
argC	LAC	2.45349	3.42225e-40	9.1142e-39	upregulated
lukG	LAC	-3.60724	7.61748e-39	2.00565e-37	downregulated
esxA	LAC	-3.74319	3.57304e-38	9.30195e-37	downregulated
lpl10	LAC	-2.19583	1.48729e-36	3.78687e-35	downregulated
yzzA	LAC	-2.53683	1.10594e-34	2.66922e-33	downregulated
tdcB	LAC	-4.2715	8.1975e-34	1.89936e-32	downregulated
sasC	LAC	5.55527	6.8968e-33	1.58217e-31	upregulated
pxpA	LAC	2.74434	3.04669e-31	6.78768e-30	upregulated
norB	LAC	-4.11164	1.5324e-29	3.17015e-28	downregulated
esxB	LAC	-3.00459	4.26147e-29	8.66125e-28	downregulated
ugpQ1	LAC	-2.00646	5.29475e-28	1.01388e-26	downregulated
essC	LAC	-3.23753	9.14617e-27	1.69533e-25	downregulated
fetB	LAC	-2.7083	8.96196e-25	1.5851e-23	downregulated
ridA	LAC	-2.03831	2.45582e-24	4.31071e-23	downregulated
esxD	LAC	-2.59942	1.69464e-23	2.80463e-22	downregulated
gtfB	LAC	-2.41934	2.71117e-23	4.42378e-22	downregulated
gtfA	LAC	-2.64348	7.58877e-23	1.22105e-21	downregulated
mntH	LAC	2.26022	3.73297e-22	5.73476e-21	upregulated
carA	LAC	-2.36958	4.97232e-22	7.57952e-21	downregulated
mtlD	LAC	-3.5984	2.68764e-21	4.01758e-20	downregulated
dprA	LAC	3.02296	4.71962e-20	6.83461e-19	upregulated
msrA	LAC	2.01988	1.1066e-19	1.59254e-18	upregulated
lytS	LAC	-2.18491	1.18896e-19	1.70051e-18	downregulated
PBCCJM_01714	LAC	-2.5132	2.25881e-19	3.21083e-18	downregulated
mtlF	LAC	-3.52056	2.45476e-18	3.30679e-17	downregulated
znuA	LAC	-2.02552	1.02903e-17	1.32458e-16	downregulated
crtN	LAC	-2.19672	1.24439e-17	1.59295e-16	downregulated
lacD	LAC	5.07054	1.3672e-17	1.74054e-16	upregulated
lacC	LAC	4.91356	1.3975e-16	1.66051e-15	upregulated
crtQ	LAC	-2.82383	1.57891e-16	1.8665e-15	downregulated
cap8B	LAC	-2.77586	1.81195e-16	2.12035e-15	downregulated
cwrA	LAC	2.597	2.74408e-16	3.14754e-15	upregulated
lCB5	LAC	-2.0721	3.997e-16	4.51759e-15	downregulated
lacB	LAC	4.99453	1.29237e-15	1.42591e-14	upregulated
metL1	LAC	-2.45369	1.31672e-15	1.4459e-14	downregulated
lacA	LAC	5.29646	1.35412e-15	1.47995e-14	upregulated
lacF	LAC	5.10305	5.01559e-15	5.23474e-14	upregulated
phnB	LAC	-2.34503	1.0084e-14	1.02029e-13	downregulated
lrgB	LAC	-4.41352	1.8312e-14	1.79783e-13	downregulated
lacE	LAC	4.38327	2.51643e-13	2.2277e-12	upregulated
crtM	LAC	-2.59639	2.51902e-13	2.2277e-12	downregulated
yocR	LAC	-2.30994	4.87115e-13	4.18017e-12	downregulated
cap8C	LAC	-2.93502	9.8407e-13	8.20176e-12	downregulated
lnsB	LAC	-2.27262	1.30055e-12	1.0762e-11	downregulated
wbiI	LAC	-2.62958	4.99039e-12	3.94633e-11	downregulated
lytR	LAC	-2.14157	2.06736e-11	1.55018e-10	downregulated
fnbB	LAC	-2.02327	4.53303e-11	3.26181e-10	downregulated
abgT	LAC	-2.47604	6.65946e-11	4.71865e-10	downregulated
uraA	LAC	-2.33517	1.19981e-10	8.34823e-10	downregulated
scn	LAC	-2.49517	1.31275e-10	9.07948e-10	downregulated
opp4C	LAC	2.25402	3.77452e-10	2.50589e-09	upregulated
merR	LAC	-2.32806	1.1029e-09	7.09837e-09	downregulated
scb	LAC	-2.53997	1.15187e-09	7.393e-09	downregulated
efeB	LAC	3.49401	2.28381e-09	1.41865e-08	upregulated
lacG	LAC	3.34133	2.89165e-09	1.77247e-08	upregulated
efb	LAC	-2.49125	4.58509e-09	2.76658e-08	downregulated
fTR1	LAC	3.31969	1.00792e-08	5.88248e-08	upregulated
crtP	LAC	-2.60667	1.97413e-08	1.10485e-07	downregulated
graF	LAC	-2.81871	4.28886e-08	2.31638e-07	downregulated
ssaA2	LAC	-2.08943	5.84728e-08	3.1217e-07	downregulated
crtO	LAC	-2.73965	6.48296e-08	3.41387e-07	downregulated
yozE	LAC	-2.10213	7.05535e-08	3.70686e-07	downregulated
amaP	LAC	-4.73971	9.86118e-08	5.10008e-07	downregulated
lrgA	LAC	-4.80647	1.91574e-07	9.67051e-07	downregulated
feoA	LAC	4.21058	2.40312e-07	1.2052e-06	upregulated
esaB	LAC	-3.07918	2.4329e-07	1.2175e-06	downregulated
pbp4	LAC	-2.56654	3.05147e-07	1.52376e-06	downregulated
nikA	LAC	-2.23996	3.78099e-07	1.86792e-06	downregulated
ycjR	LAC	-2.01479	1.77707e-06	8.02627e-06	downregulated
sdrE	LAC	-2.11504	2.54157e-06	1.13903e-05	downregulated
efeO	LAC	2.66387	6.38249e-06	2.72845e-05	upregulated
agrA	LAC	-2.2546	8.01395e-06	3.38968e-05	downregulated
opp3b	LAC	-2.12799	1.05344e-05	4.35085e-05	downregulated
opp3C	LAC	-2.21526	1.16546e-05	4.78788e-05	downregulated
sarS	LAC	-2.21303	2.62386e-05	0.000101743	downregulated
fpr	LAC	-2.06338	0.000322743	0.00102719	downregulated
asp23	LAC	-3.72218	0.00142528	0.00397877	downregulated
